# Supplementary material for: Synergistic effect of alloying on thermoelectric properties of two-dimensional PdPQ (Q = S, Se)
Source: Royal Society of Chemistry journal article supplement (doi:10.1039/d2cp05979g), 2023-01-01
Supplement: d2cp05979g1.pdf [file d2cp05979g1.pdf]

## Supporting Information

---

# Synergistic Effect of Alloying on Thermoelectric Properties of Two-Dimensional PdP $Q$ ( $Q=S, Se$ )

Shima Shahabfar<sup>1</sup>, Yi Xia<sup>2</sup>, M. Hossein Morshedsolouk<sup>1</sup>, Mahsa Mohammadi  
Bidhendi<sup>1</sup>, and S. Shahab Naghavi<sup>1\*</sup>

<sup>1</sup>Department of Physical and Computational Chemistry, Shahid Beheshti University, Tehran  
1983969411, Iran

<sup>2</sup>Department of Mechanical and Materials Engineering, Portland State University, Portland, Oregon,  
97201, USA

E-mail: s\_naghavi@sbu.ac.ir

| Compound | a     | b     | BG <sub>PBE</sub> | BG <sub>HSE</sub> | BG <sub>SOC</sub> | $\epsilon_{\infty}^{xx}$ | $\epsilon_{\infty}^{yy}$ | P—P Dissociation Energy (eV) |
|----------|-------|-------|-------------------|-------------------|-------------------|--------------------------|--------------------------|------------------------------|
| PdPS     | 5.698 | 7.731 | 1.19              | 2.16              | 1.1929            | 4.22                     | 4.28                     | 1.67                         |
| PdPSe    | 5.846 | 5.902 | 1.1164            | 2.012             | 1.098             | 4.64                     | 4.75                     | 1.72                         |

Table S1: Lattice parameters(Å), band gaps in eV(PBE, HSE, and spin orbit coupling included) and infinite dielectric constants for PdPSe and PdPS monolayers.

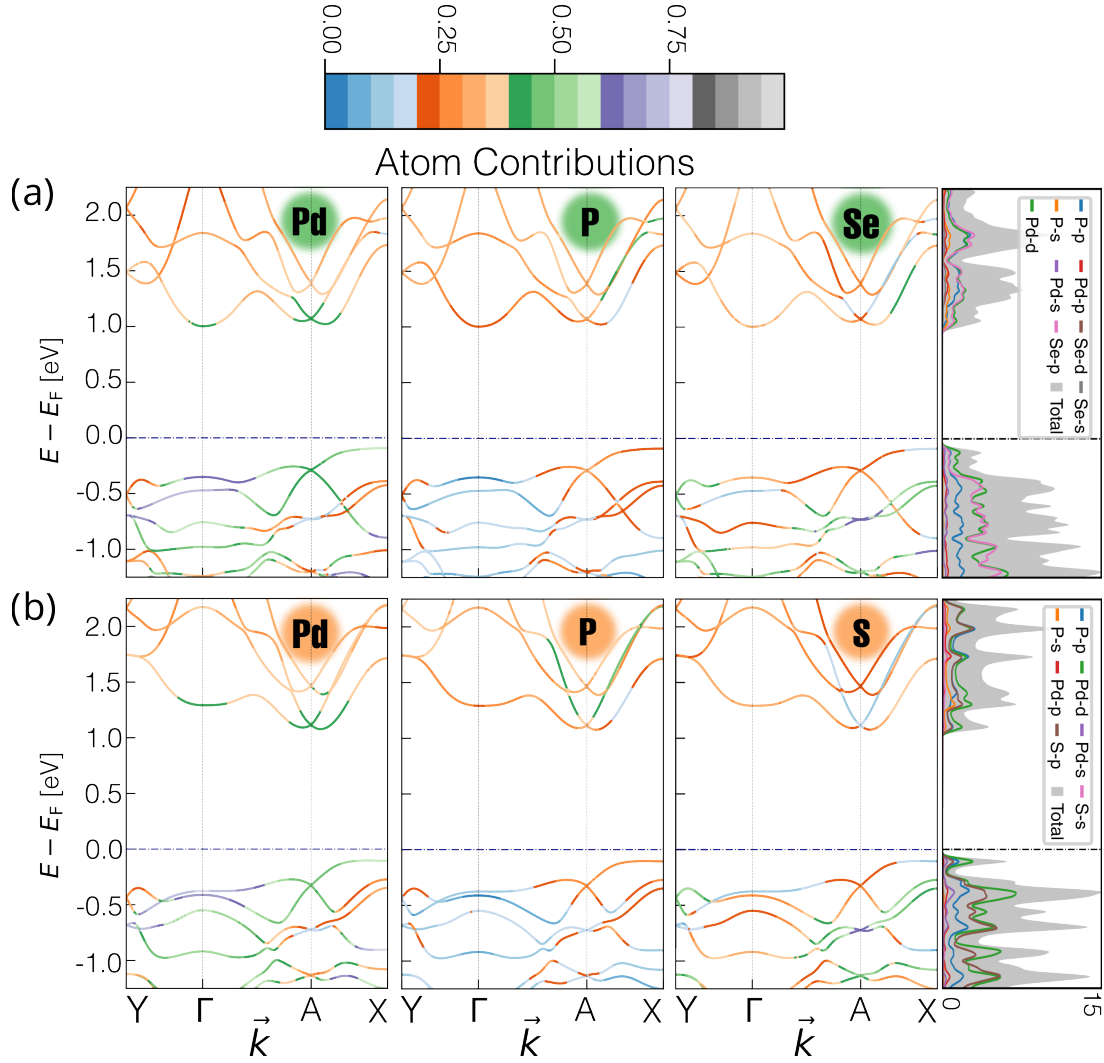

Fig. S1: Atom projected band structures of PdPSe .

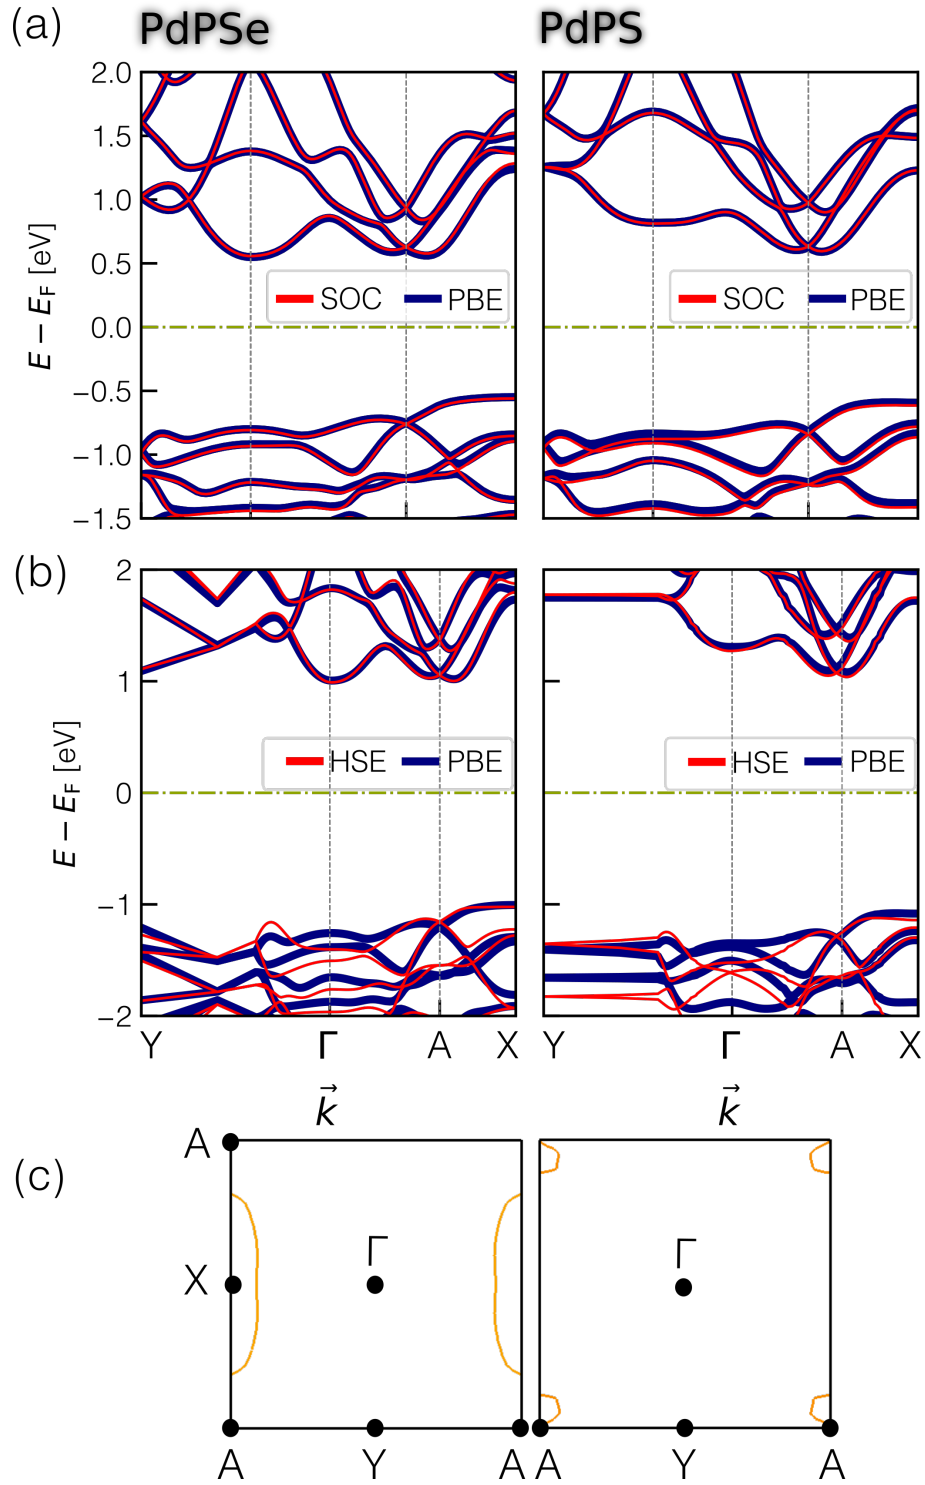

Fig. S2: a,b) Band structures of PdPSe and PdPS with and without including spin orbit coupling (SOC), and with different exchange correlation functionals, c) Fermi surface for PdPS around 36 meV above and below the Fermi level for valence band (left) and conduction band (right).

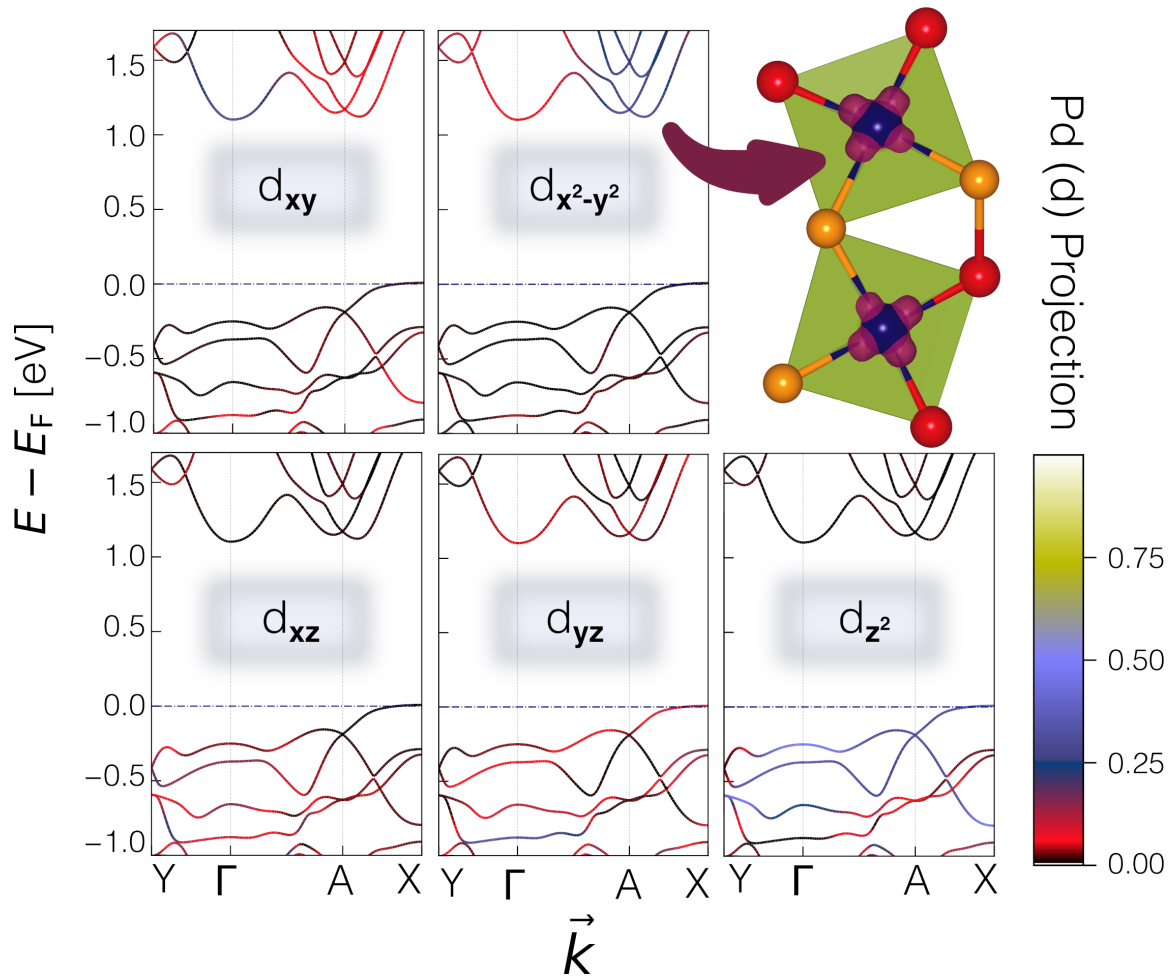

Fig. S3: PdPSe band structure with d orbitals projections. The contributions of  $d_{x^2-y^2}$  and  $d_{xy}$  in conduction band and  $d_{z^2}$  in the valence band are predominant.

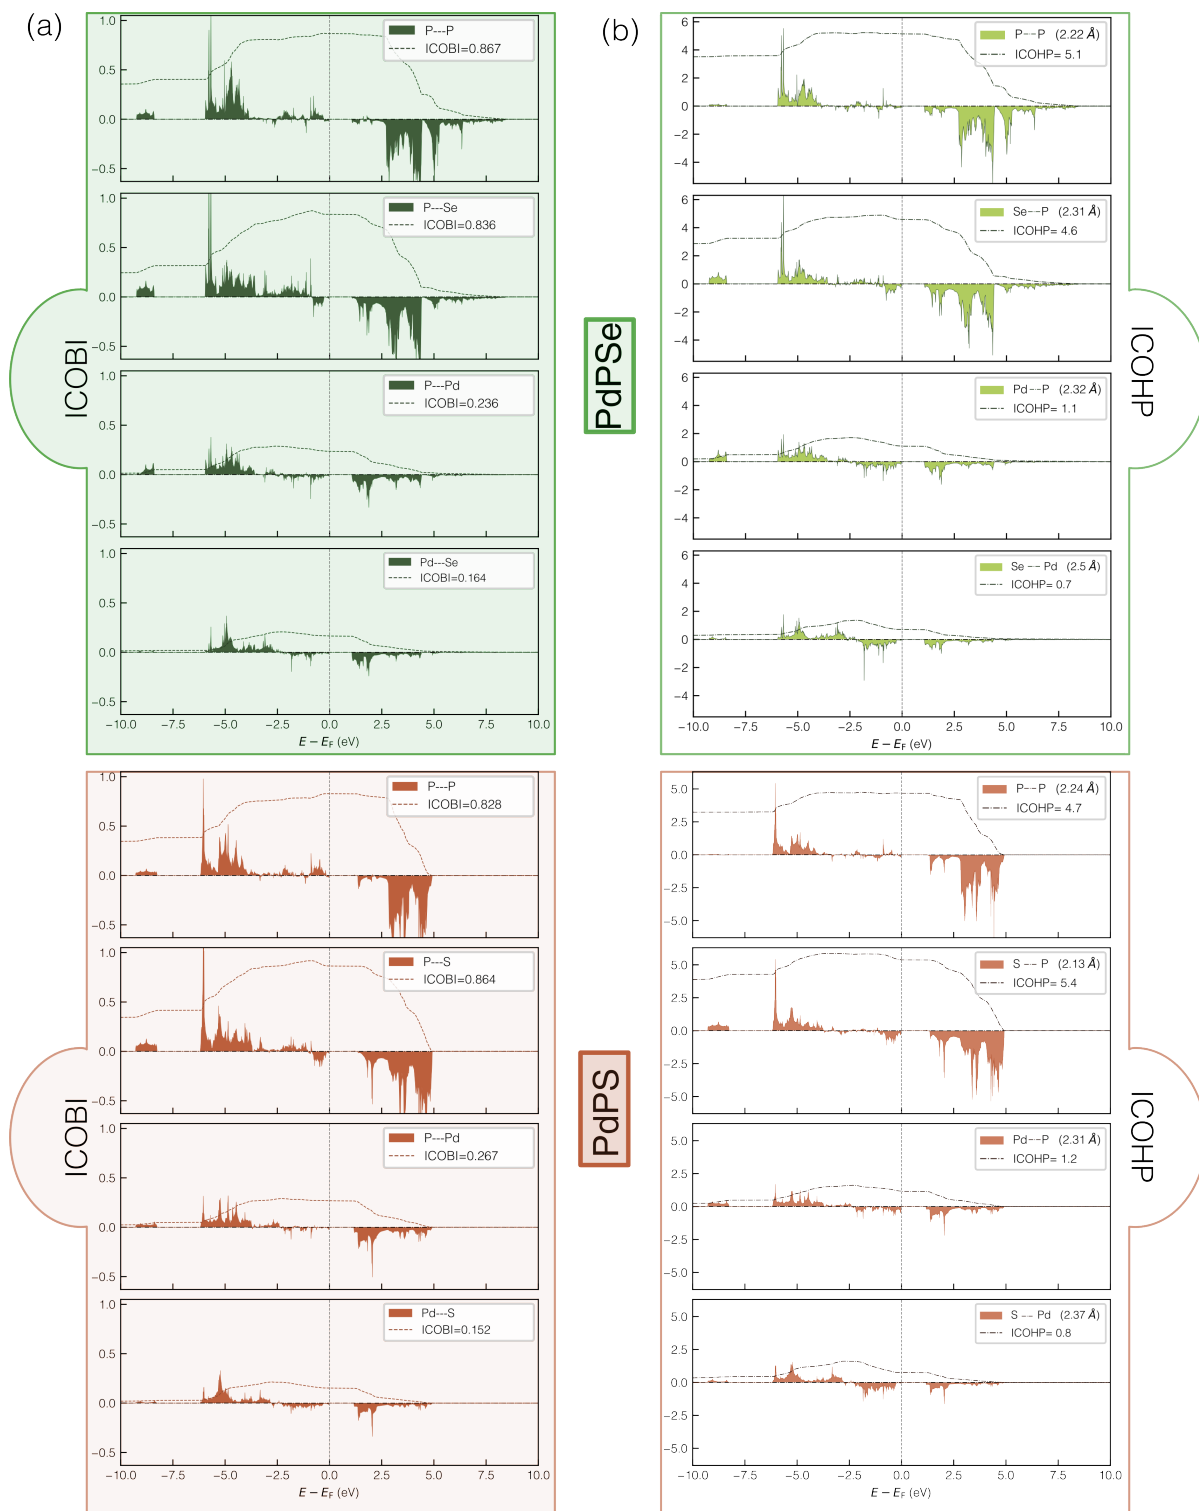

Fig. S4: COBI (crystal orbital bonding index) and COHP (crystal orbital hamilton population) analysis and their integration for PdPS and PdPSe. The high amount of COBI index is related to the covalent nature of P-Q and P-P bonding character and the low amount of COBI can be referred to the ionic bonds between Pd-P, Pd-Q.

Table S2: COBI, COHP, Bader and Born effective charges for PdPSe and PdPS. It is clear that anionic framework is bonded covalently within itself and it's linked to Pd ionically.

|       | Analysis | Pd-Q  | Pd-P  | P-P   | P-Q   | Pd   | P    | Q    |
|-------|----------|-------|-------|-------|-------|------|------|------|
| PdPSe | ICOBI    | 0.164 | 0.236 | 0.867 | 0.836 | —    | —    | —    |
|       | ICOHP    | 0.7   | 1.1   | 5.1   | 4.6   | —    | —    | —    |
|       | Bader    | —     | —     | —     | —     | 0.02 | 0.19 | 0.20 |
|       | $z^*$    | —     | —     | —     | —     | 0.16 | 2.15 | 0.58 |
| PdPS  | ICOBI    | 0.152 | 0.276 | 0.828 | 0.864 | —    | —    | —    |
|       | ICOHP    | 0.8   | 1.2   | 4.7   | 5.4   | —    | —    | —    |
|       | Bader    | —     | —     | —     | —     | 0.12 | 0.27 | 0.48 |
|       | $Z^*$    | —     | —     | —     | —     | 0.14 | 2.19 | 0.96 |

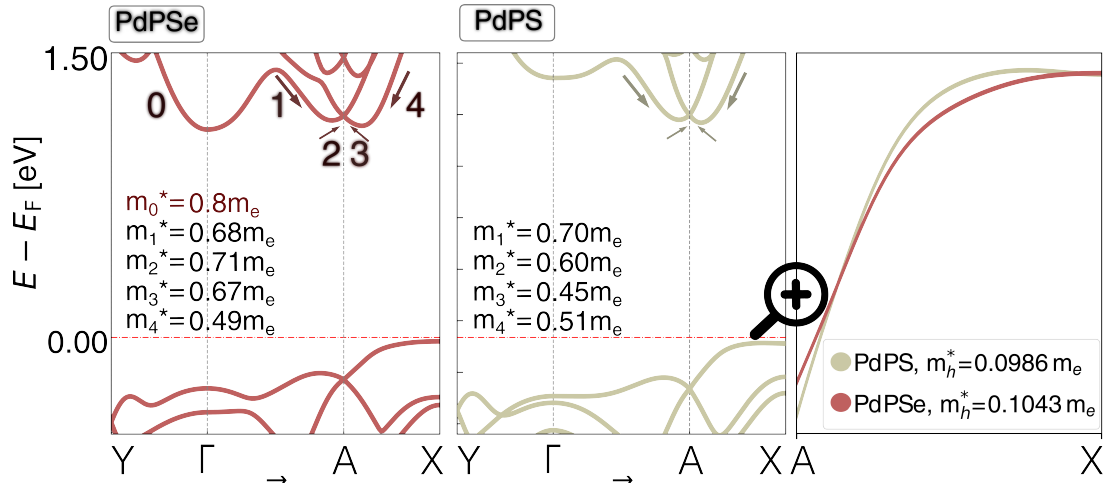

Fig. S5: Effective masses for different pathways in the band structures of PdPSe and PdPS compounds.

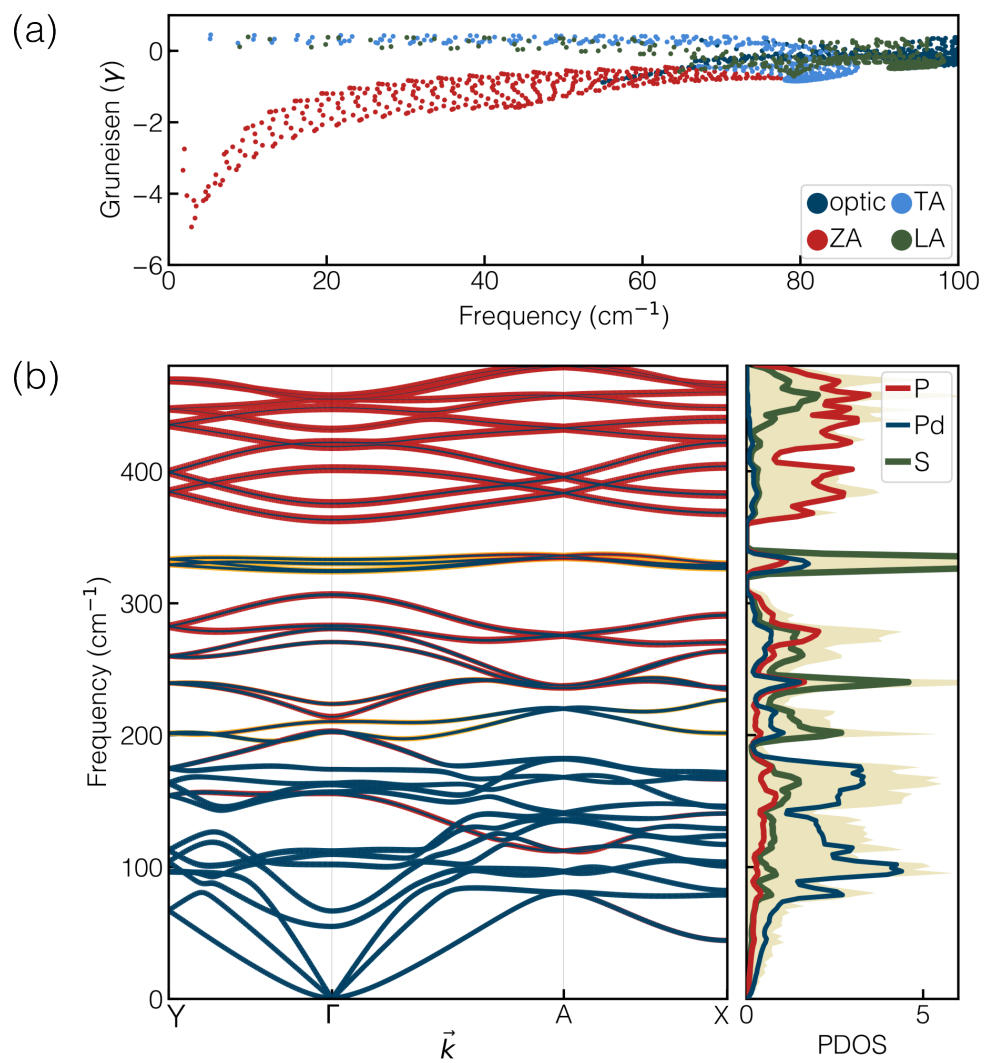

Fig. S6: Gruneisen parameter and phonon dispersion curve for PdPS.

Table S3: Calculated group velocities ( $\nu_g$ ) and Debye temperature ( $\theta_D$ ) of ZA, TA and LA phonons near the  $\Gamma$  point for the 2D-PdPQs along the  $a$ - ( $X-\Gamma$ ) and  $b$ -directions ( $Y-\Gamma$ ) compared with MoS<sub>2</sub>.

| MLs              | CDs          | $\nu_g$ (Km/s) |       |       | $\theta_D$ (K) |        |        |
|------------------|--------------|----------------|-------|-------|----------------|--------|--------|
|                  |              | ZA             | TA    | LA    | ZA             | TA     | LA     |
| PdPS             | $a$ -axis    | 0.963          | 3.721 | 6.184 | 63.713         | 113.79 | 121.01 |
|                  | $b$ -axis    | 0.819          | 3.706 | 6.948 | 96.424         | 116.14 | 138.59 |
| PdPSe            | $a$ -axis    | 0.766          | 3.253 | 5.094 | 51.693         | 89.059 | 99.076 |
|                  | $b$ -axis    | 0.774          | 3.237 | 5.922 | 80.193         | 96.198 | 110.99 |
| MoS <sub>2</sub> | $a, b$ -axis | 1.40           | 3.96  | 6.47  | 257.90         | 257.90 | 326.98 |

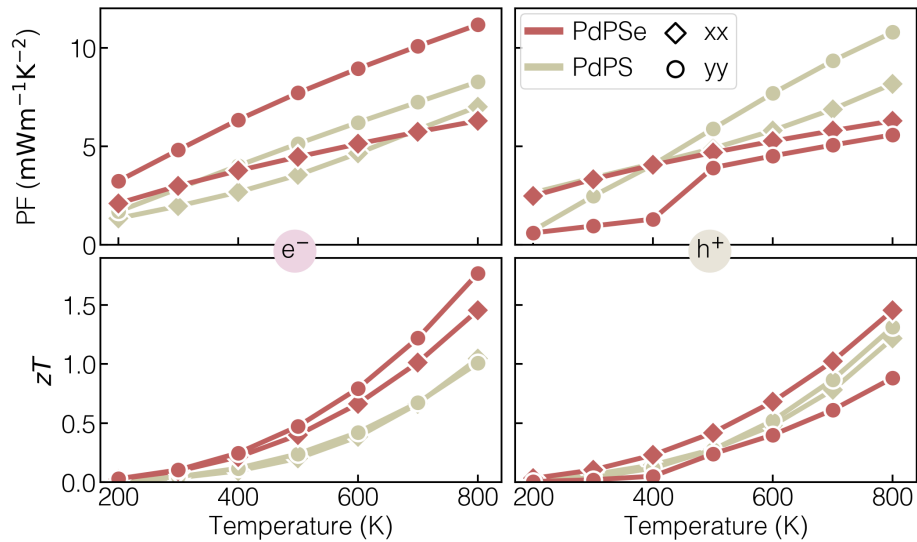

Fig. S7: Power factors and figure of merit for PdPSe and PdPS without including electronic relaxation time.



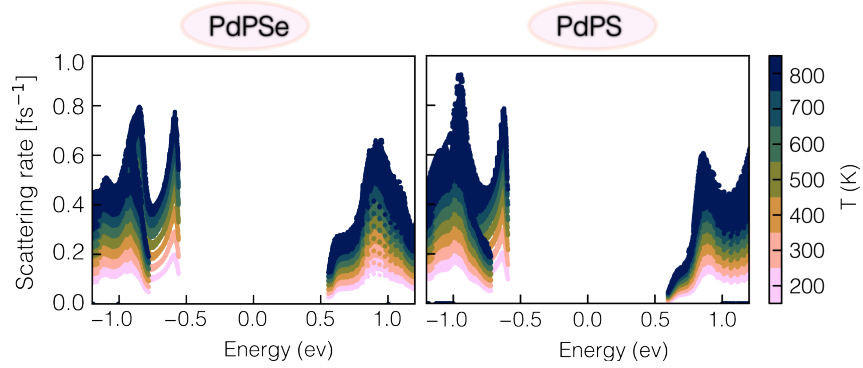

Fig. S8: Electronic scattering rates for PdPSe and PdPS calculated in different temperatures.

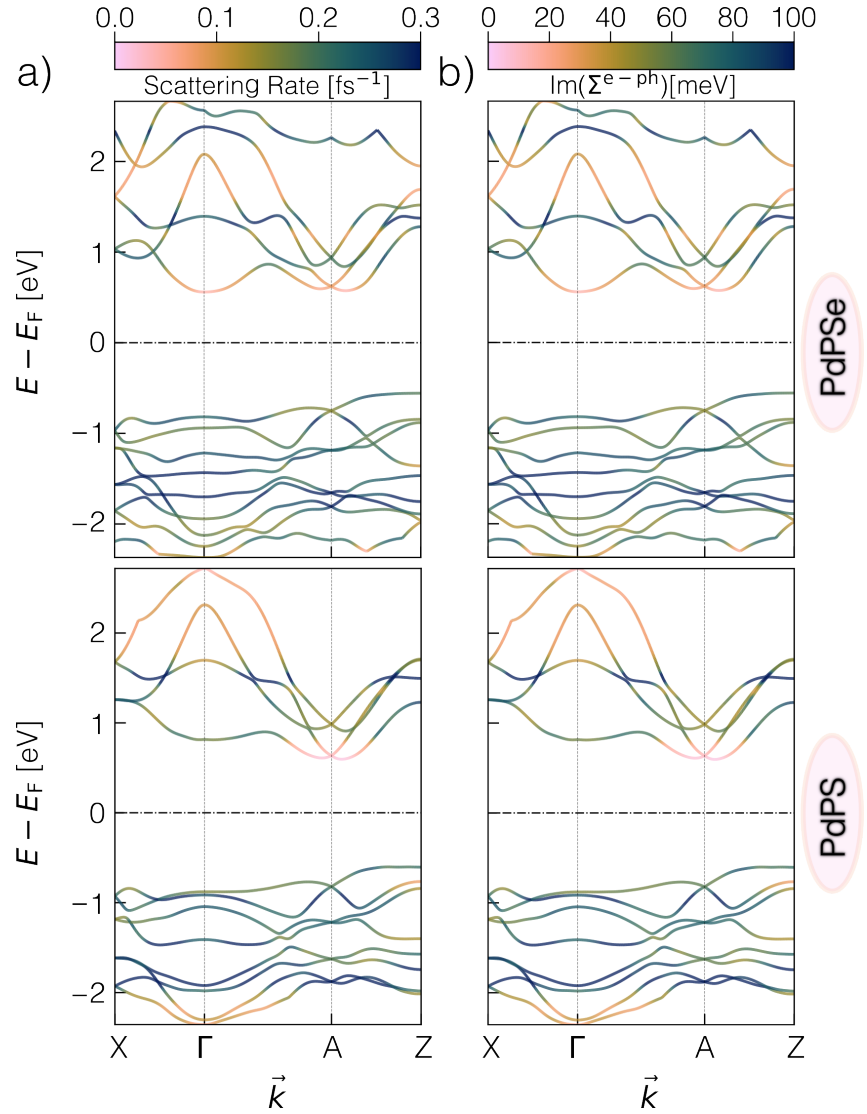

Fig. S9: Electronic scattering rates and relaxation times for PdPSe and PdPS calculated with ab-initio method.

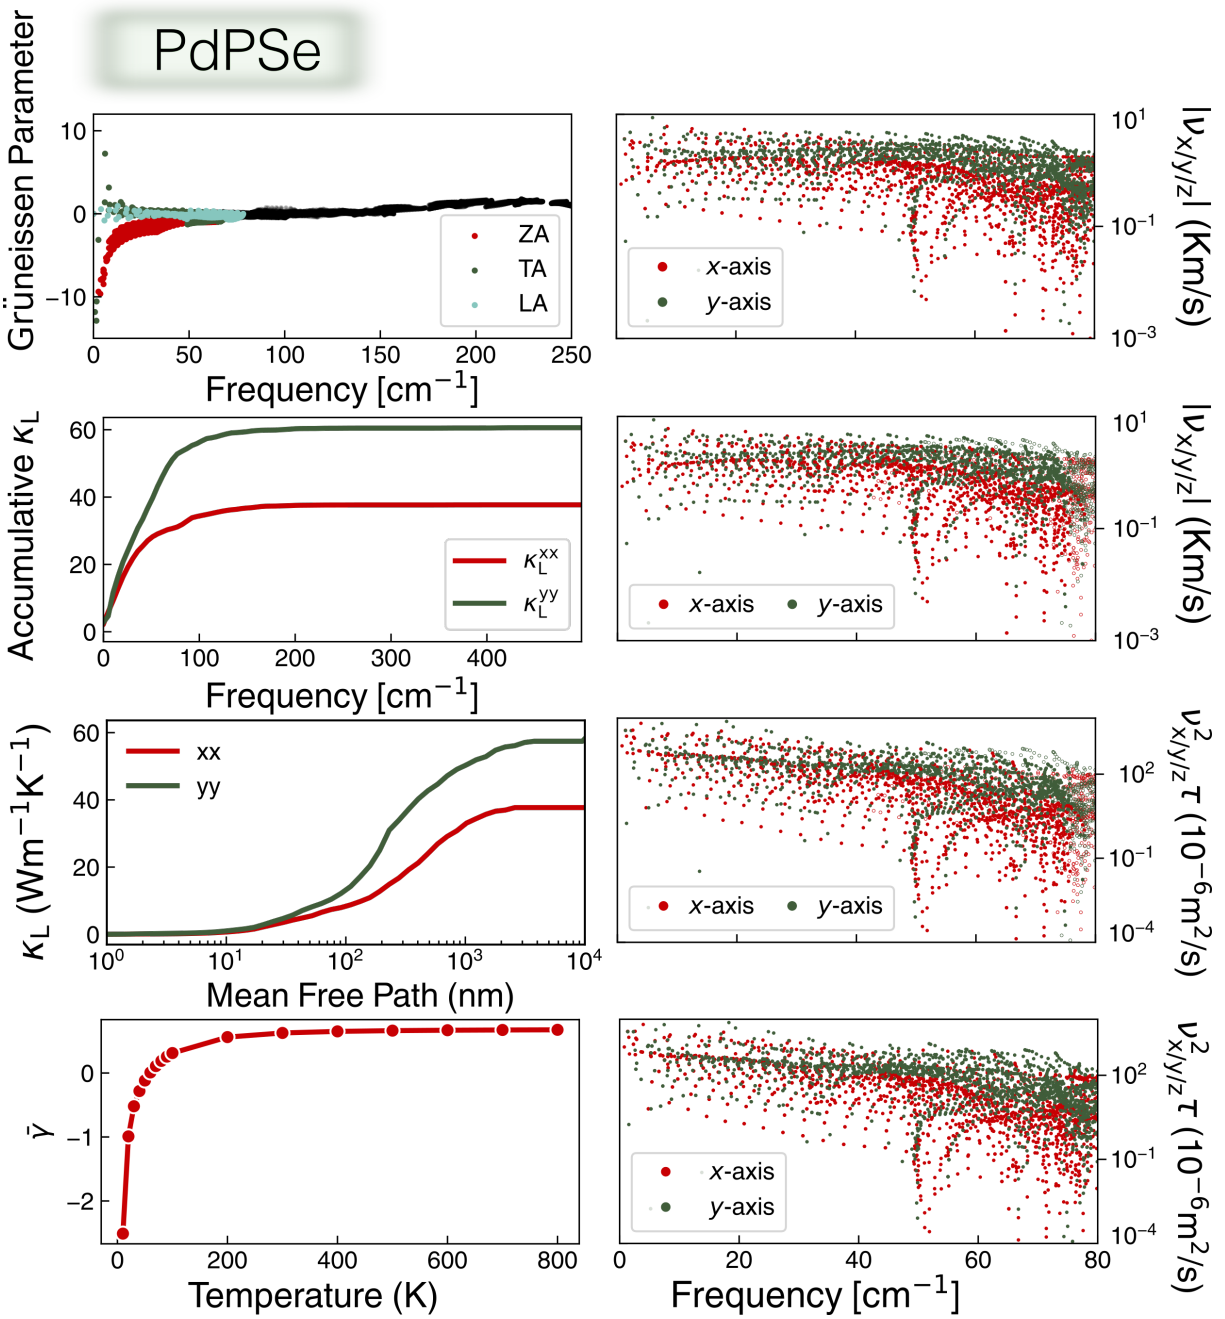

Fig. S10: ShengBTE Plots for PdPSe

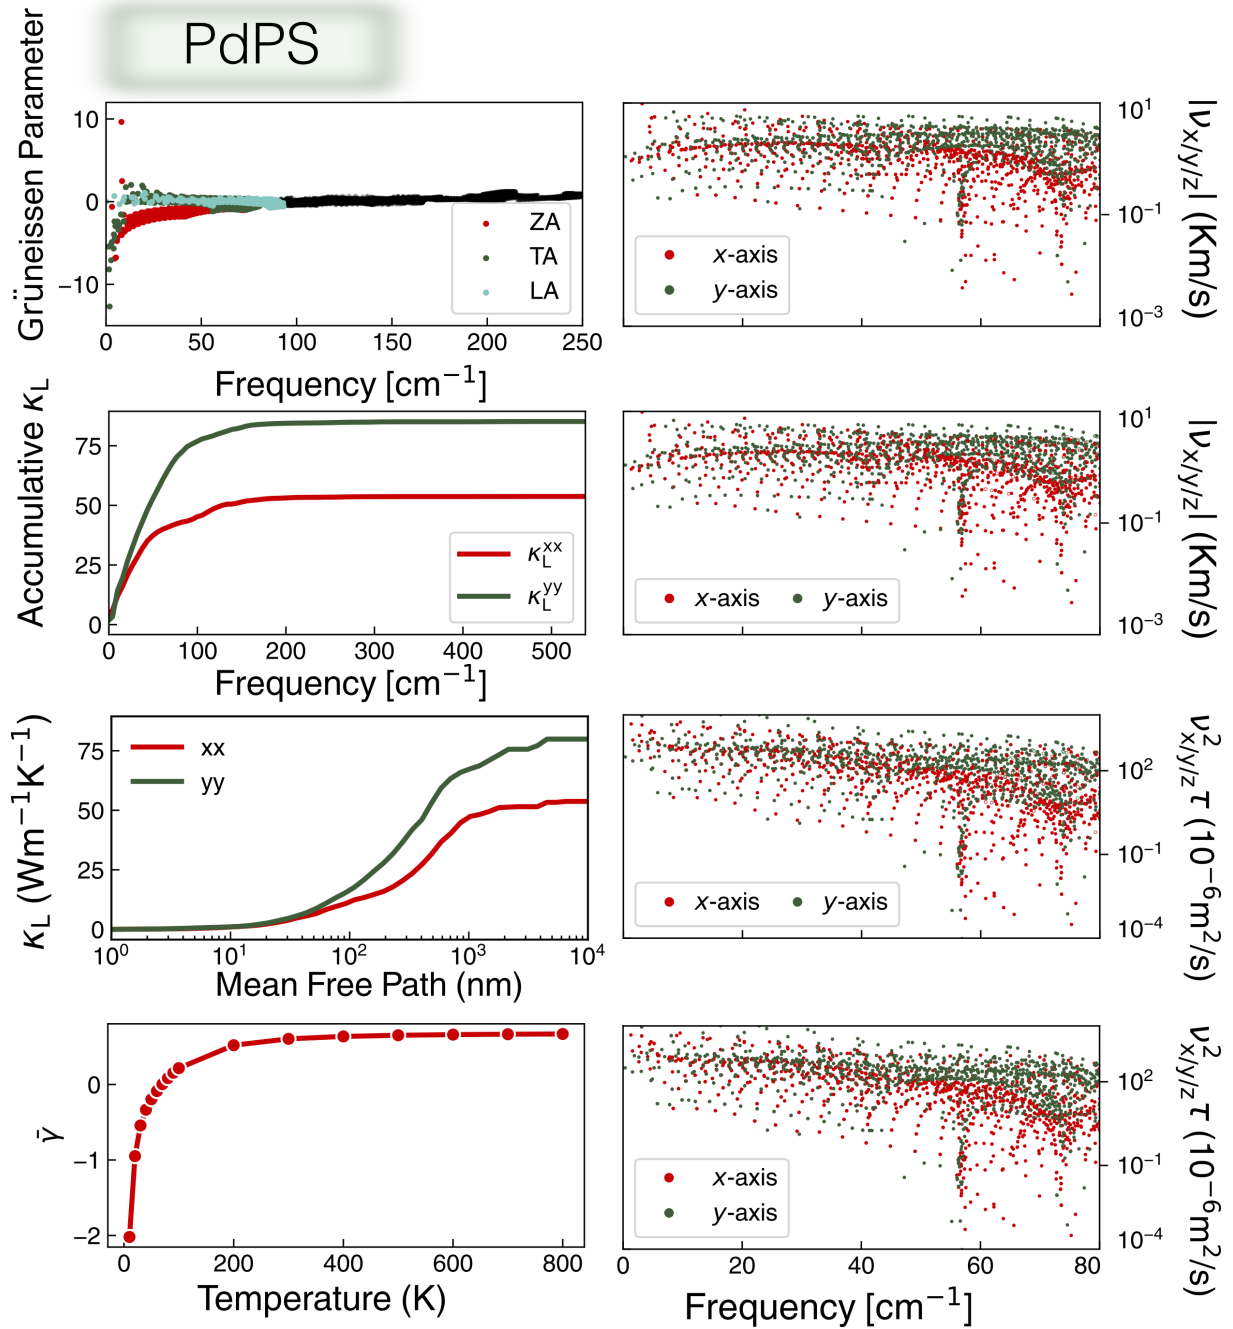

Fig. S11: ShengBTE Plots for PdPS

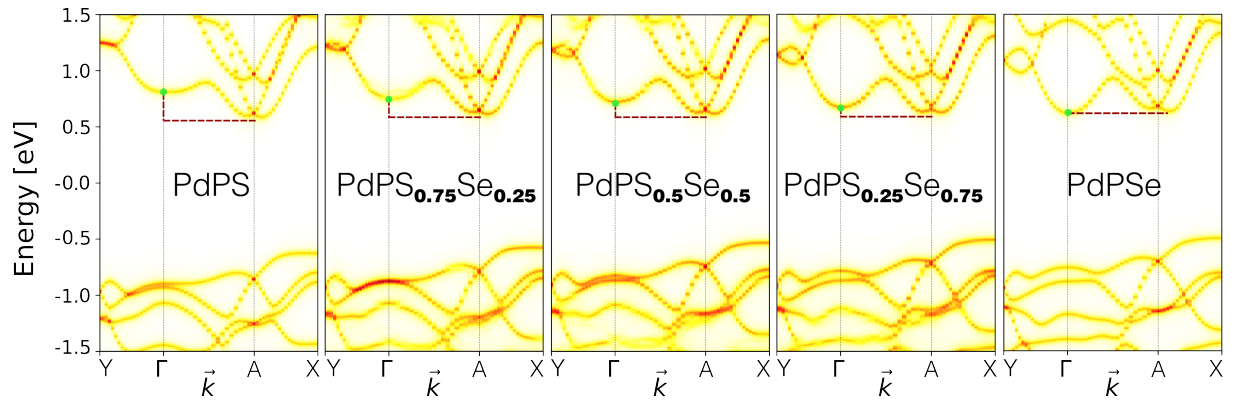

Fig. S12: Unfolded band structures for solid solutions. It is clear that the conduction band alignment is highly dependent to Se amount.

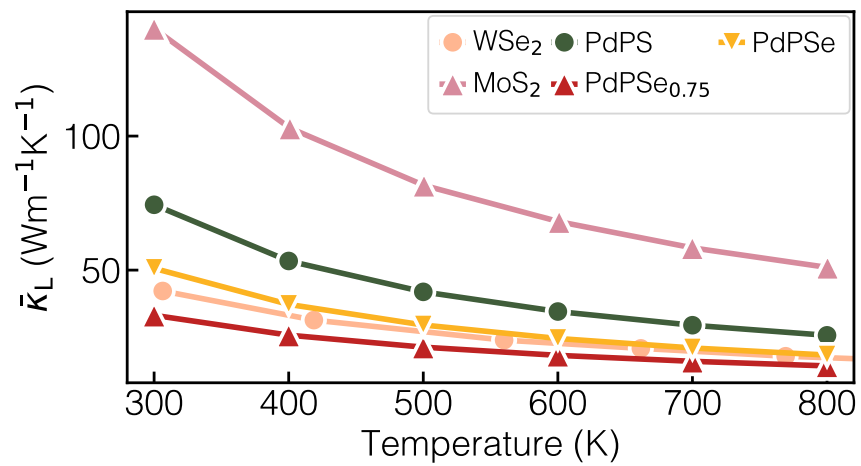

Fig. S13: Comparison between lattice thermal conductivities of 2D-transition metal dichalcogenides and 2D-PdPQs.

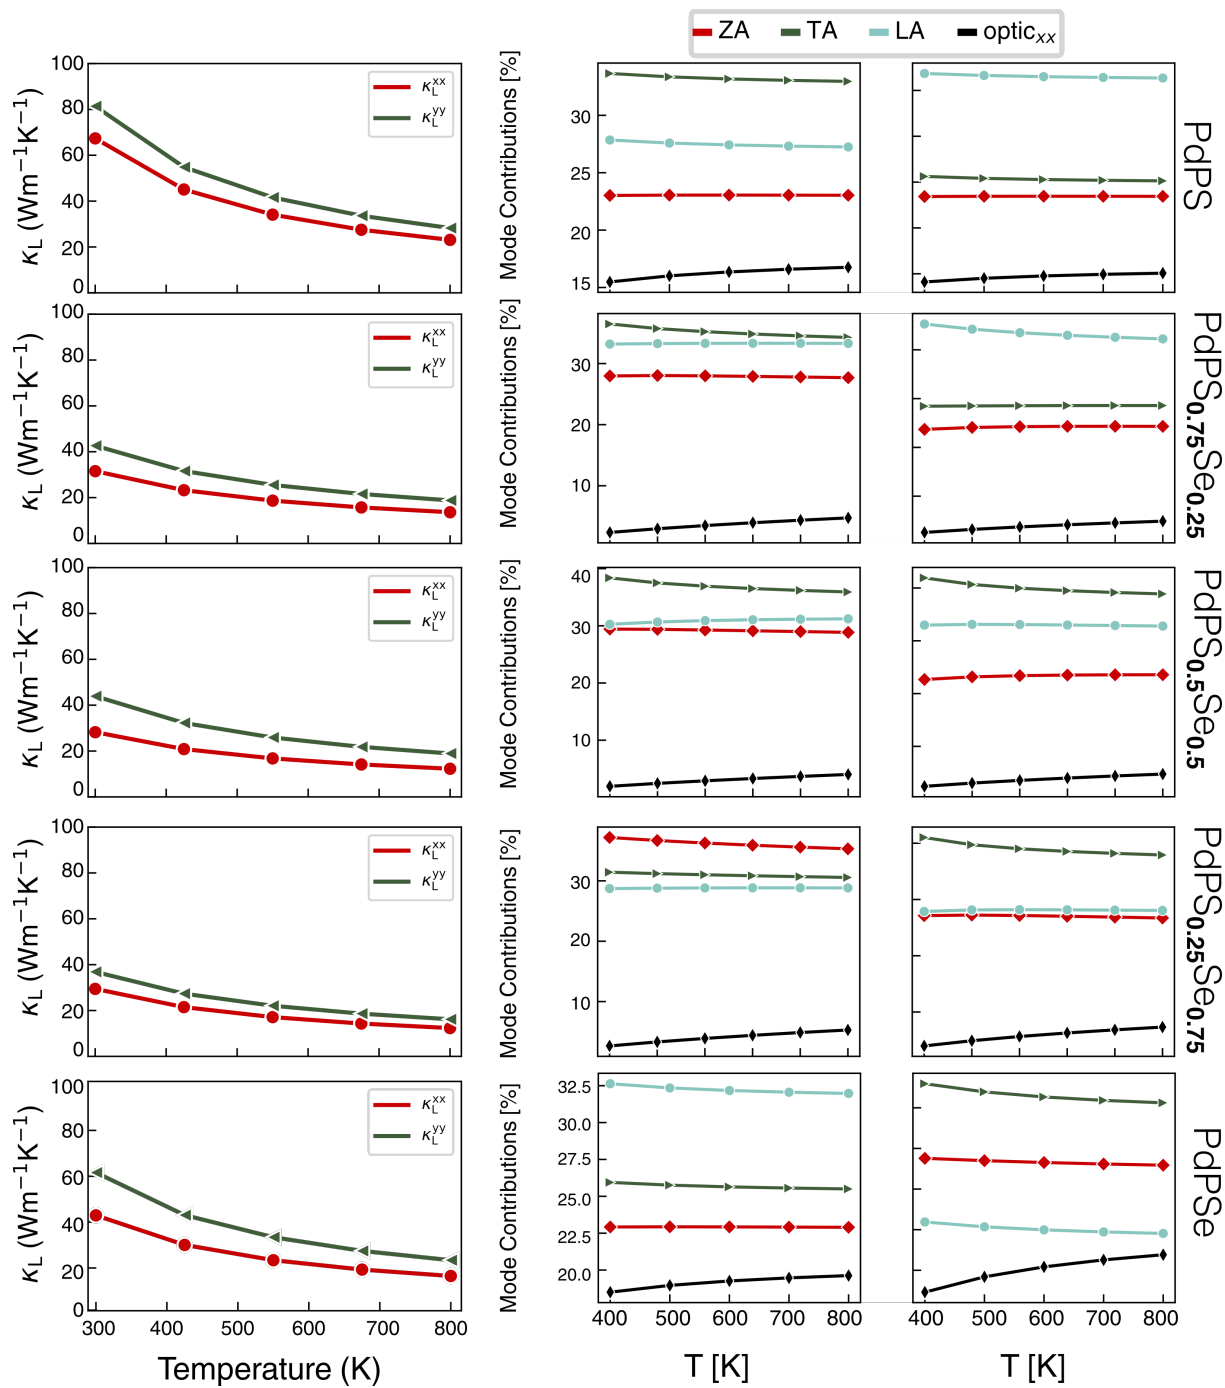

Fig. S14: Lattice thermal conductivities and their mode contributions for alloyed compounds.
